# Supplementary material for: Mini-sternotomy versus conventional sternotomy for aortic valve replacement: a randomised controlled trial
Source: PubMed Central journal article supplement — BMJ Open. 2021 Jan 29;11(1):e041398. doi: 10.1136/bmjopen-2020-041398 (PMC7849899; doi:10.1136/bmjopen-2020-041398), 2021-01-29
Supplement: bmjopen-2020-041398supp001.pdf [file bmjopen-2020-041398supp001.pdf]

### Supplementary Material

|                                                                                                 |     |
|-------------------------------------------------------------------------------------------------|-----|
| Study Investigators: trial site, clinical trials unit, statistics, health economics, committees | 2   |
| Table 1. Eligibility criteria                                                                   | 3   |
| Figure 1. Trial recruitment by month                                                            | 4   |
| Table 2. Conversion from mini-sternotomy to conventional sternotomy                             | 5   |
| Table 3. Number of operations by Consultant Surgeon                                             | 6   |
| Figure 2. Haemoglobin profiles                                                                  | 7   |
| Table 4. Analgesic use and Pain scores                                                          | 8-9 |
| Table 5. Adverse Events                                                                         | 10  |
| Table 6. Health status, resource use and cost (complete cases)                                  | 11  |
| Table 7. ICU Length of Stay, Fitness for Discharge and Hospital Length of Stay                  | 12  |
| Table 8. Pulmonary function tests                                                               | 13  |

**Study Investigators: trial site, trials unit, statistics, health economics, committees***Trial Site*

The James Cook University Hospital, South Tees Hospitals NHS Foundation Trust, Middlesbrough, United Kingdom

*Investigators*

- Mr Enoch Akowuah (Chief Investigator)
- Mr Andrew Goodwin (co-Investigator)
- Professor W Andrew Owens (co-Investigator)

*Research Team*

- Heather Robinson
- Jonathan Broughton
- Dr Khalid Khan

*Clinical Trials Unit*

Durham Clinical Trials Unit, Durham University; now Newcastle Clinical Trials Unit, Newcastle University

*Investigators*

- Professor Helen Hancock (co-Investigator)
- Rebecca Maier (co-Investigator)

*Research Team*

- Andrew Thorpe
- Jennifer Wilkinson
- Dr Leanne Marsay

*Statistics*

Statistics Group, Wolfson Research Institute for Health and Wellbeing, Durham University

*Investigator*

- Dr Adetayo Kasim (co-Investigator)

*Health Economics*

Durham Clinical Trials Unit, Durham University; now University of Warwick

*Investigator*

- Professor James Mason (co-Investigator)

*Committees**Data Monitoring Committee Membership*

- Mr Graham Cooper (Chair)
- Mr Heyman Luckraz
- Professor Chris Rogers

*Trial Steering Committee Membership*

- Mr Sukumaran Nair (Chair until Sep 2014)
- Professor Gavin Murphy (Acting Chair Oct 2014 to June 2015)
- Mr Peter Braidley (Chair, from July 2015)
- Mr Paul Modi
- Mr Brendan Ellis

**Table 1. Eligibility criteria**

## Inclusion Criteria

- Aged 18 years or older at the time of consent
- Requiring first-time, non-emergency, isolated Aortic Valve Replacement surgery
- Able and willing to provide written informed consent

## Exclusion Criteria

- requiring concomitant cardiac procedure(s) including redo surgery, emergency or salvage surgery,
- only conventional median sternotomy indicated\*,
- haemoglobin level < 90g/L,
- pregnant\*\*,
- currently participating in another interventional clinical trial,
- previous cardiac surgery,
- are unable to stop currently prescribed treatment affecting clotting (e.g., heparin, warfarin), \*\*\*
- a history of thrombophilia, thrombocytopenia or other haematological conditions that would affect participation in the trial as determined by one of the three operating surgeons,
- infective endocarditis,
- prevented from having red blood cells and blood products according to a system of beliefs (e.g. Jehovah's Witnesses),
- having any other medical, psychiatric and or social reason as determined by the consenting surgeon that precludes participation.

\* patients were excluded if only conventional median sternotomy was indicated, for example in the presence of significant skeletal abnormalities like kyphosis. They were also excluded if transoesophageal echocardiography could not be performed, as this was mandatory to perform safe peripheral venous cannulation. All 3 surgeons used consistent criteria.

\*\* in women of child bearing age (18 – 50) a pregnancy test was performed within 14 days of surgery prior to randomisation.

\*\*\*for patients in both trial arms, pre-operative antiplatelet drugs (including clopidogrel and ticagrelor), and anti-coagulants (including warfarin and heparin) were discontinued 5 days prior to surgery. These drugs were re-started following surgery at the discretion of the clinical team. The exception to this was aspirin, which was stopped 5 days prior to surgery where possible, however continuation until the day of surgery did not exclude a patient from the trial.

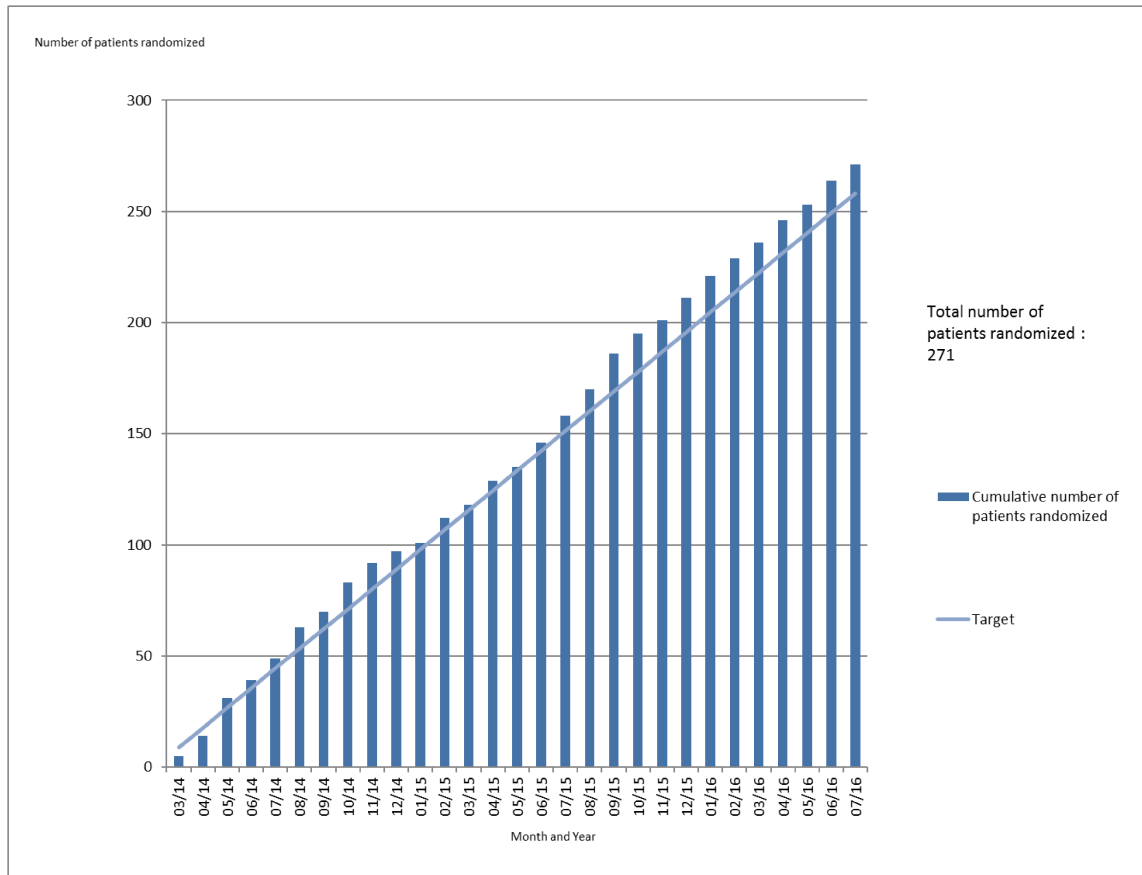

Figure 1. Trial recruitment by month.

**Table 2. Conversion from mini-sternotomy to conventional sternotomy**

| Reason for conversion                                 | Number of patients | Details                                                                                                                                                                                                                                                                                                                                                                                                                                                                                                                                                                                                                                                                                                                                               |
|-------------------------------------------------------|--------------------|-------------------------------------------------------------------------------------------------------------------------------------------------------------------------------------------------------------------------------------------------------------------------------------------------------------------------------------------------------------------------------------------------------------------------------------------------------------------------------------------------------------------------------------------------------------------------------------------------------------------------------------------------------------------------------------------------------------------------------------------------------|
| <b>Anaesthetic emergency</b>                          | <b>2</b>           | <ul style="list-style-type: none"> <li>• Patient became unstable as they were transferred into theatre and BP dropped – required conventional to re-stabilise</li> <li>• Anaphylactic reaction on induction needing CPR. Operation cancelled, patient taken to ITU. Widespread rash. Decision made the following morning to proceed to AVR (via full sternotomy)</li> </ul>                                                                                                                                                                                                                                                                                                                                                                           |
| <b>Difficult vascular access (venous or arterial)</b> | <b>9</b>           | <p>Venous</p> <ul style="list-style-type: none"> <li>• Femoral vessels unsuitable for cannulation</li> <li>• Poor venous drainage</li> <li>• Unable to pass venous dilators</li> <li>• Unable to insert pipe. Resistance felt, no back flow of blood. Femoral cannulation abandoned</li> <li>• Impossible to dilate femoral vein. Despite re-wiring, guide wire coiling within pelvic venous system</li> </ul> <p>Arterial</p> <ul style="list-style-type: none"> <li>• Difficulties cannulating femoral artery leading to haemodynamic instability</li> <li>• Poor access, unable to clamp aorta</li> <li>• Severe calcification of ascending aorta</li> <li>• Difficult access; aorta displaced to the left. Body habitus limited access</li> </ul> |
| <b>Intra-operative complications</b>                  | <b>5</b>           | <ul style="list-style-type: none"> <li>• Bleeding from aortotomy site</li> <li>• Bleeding</li> <li>• Intra-operative decision to performed bypass graft to LAD</li> <li>• Post implant TOE showed small paravalvular leak and bleeding from aortotomy incision</li> <li>• Mild/moderate paravalvar leak on TOE. Required valve re-implant</li> </ul>                                                                                                                                                                                                                                                                                                                                                                                                  |
| <b>TOTAL</b>                                          | <b>16</b>          |                                                                                                                                                                                                                                                                                                                                                                                                                                                                                                                                                                                                                                                                                                                                                       |

**Table 3. Number of operations performed by Consultant Surgeon**

|                      | Mini-sternotomy group<br>n=patients (%) | Conventional sternotomy<br>group<br>n=patients (%) | Total<br>n=patients (%) |
|----------------------|-----------------------------------------|----------------------------------------------------|-------------------------|
| Consultant Surgeon A | 58 (43.0)                               | 58 (43.0)                                          | 116 (43.0)              |
| Consultant Surgeon B | 43 (31.9)                               | 35 (25.9)                                          | 78 (28.9)               |
| Consultant Surgeon C | 34 (25.1)                               | 42 (31.1)                                          | 76 (28.1)               |

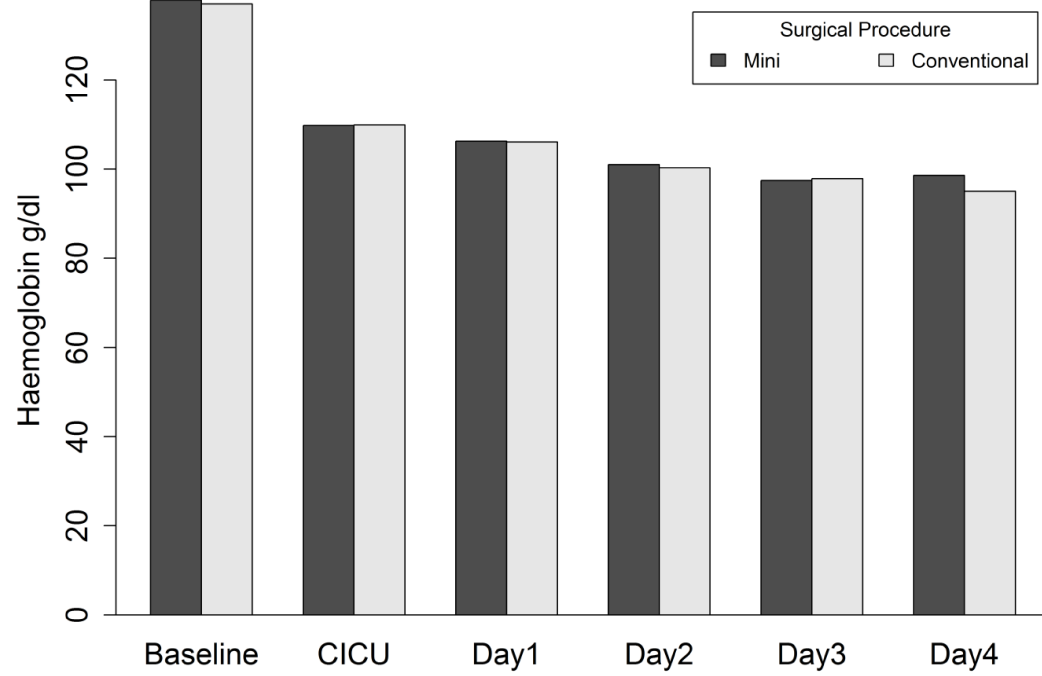

**Figure 2. Haemoglobin profiles at Baseline, during CICU stay, and day 1 to day 4 post index surgery, by group**

Table 4. Analgesic use and pain scores

| Medication                          | Mini-sternotomy Group (135 patients)<br>n = patients (%) | Conventional Sternotomy Group (135 patients)<br>n = patients (%) | Total (270 patients)<br>n = patients (%) |
|-------------------------------------|----------------------------------------------------------|------------------------------------------------------------------|------------------------------------------|
| <b>Analgesic use at baseline</b>    |                                                          |                                                                  |                                          |
| Buprenorphine patch                 | 3 (2.2)                                                  | 1 (0.7)                                                          | 4 (1.5)                                  |
| Codeine Phosphate                   | 4 (3.0)                                                  | 3 (0.7)                                                          | 7 (2.6)                                  |
| Dihydrocodeine Tartrate             | 0 (0.0)                                                  | 1 (0.7)                                                          | 1 (0.4)                                  |
| Durogesic patch                     | 0                                                        | 1 (0.7)                                                          | 1 (0.4)                                  |
| Fentanyl                            | 1 (0.7)                                                  | 0 (0.0)                                                          | 1 (0.4)                                  |
| Gabapentin                          | 1 (0.7)                                                  | 0 (0.0)                                                          | 1 (0.4)                                  |
| Morphine Sulfate                    | 0.0                                                      | 1 (0.7)                                                          | 1 (0.4)                                  |
| Naxoproxen                          | 1 (0.7)                                                  | 0 (0.0)                                                          | 1 (0.4)                                  |
| Paracetamol                         | 13 (9.6)                                                 | 8 (5.9)                                                          | 21 (7.8)                                 |
| Tramadol Hydrochloride              | 0 (0.0)                                                  | 2 (1.5)                                                          | 2 (0.7)                                  |
| <b>At least one med at baseline</b> | <b>16 (11.9)</b>                                         | <b>12 (8.9)</b>                                                  | <b>28 (10.4)</b>                         |
| <b>Analgesic use at day 2</b>       |                                                          |                                                                  |                                          |
| Buprenorphine patch                 | 1 (0.7)                                                  | 0 (0.0)                                                          | 1 (0.4)                                  |
| Codeine Phosphate                   | 18 (13.3)                                                | 16 (11.9)                                                        | 34 (12.6)                                |
| Dihydrocodeine Tartrate             | 4 (3.0)                                                  | 6 (4.4)                                                          | 10 (3.7)                                 |
| Fentanyl                            | 1 (0.7)                                                  | 0 (0.0)                                                          | 1 (0.4)                                  |
| Gabapentin                          | 1 (0.7)                                                  | 0 (0.0)                                                          | 1 (0.4)                                  |
| Morphine Sulfate                    | 13 (9.6)                                                 | 13 (9.6)                                                         | 26 (9.6)                                 |
| Oramorph                            | 1 (0.7)                                                  | 1 (0.7)                                                          | 2 (0.7)                                  |
| Paracetamol                         | 94 (69.6)                                                | 80 (59.3)                                                        | 174 (64.4)                               |
| Pregabalin                          | 1 (0.7)                                                  | 0 (0.0)                                                          | 1 (0.1)                                  |
| Tramadol Hydrochloride              | 7 (5.2)                                                  | 5 (3.7)                                                          | 12 (4.4)                                 |
| <b>At least one med at day 2</b>    | <b>99 (73.3)</b>                                         | <b>86 (63.7)</b>                                                 | <b>185 (68.5)</b>                        |
| <b>Analgesic use at day 3</b>       |                                                          |                                                                  |                                          |
| Buprenorphine patch                 | 1 (0.7)                                                  | 0(0.0)                                                           | 1 (0.4)                                  |
| Codeine Phosphate                   | 14 (10.4)                                                | 21 (15.6)                                                        | 35 (13.0)                                |
| Dihydrocodeine Tartrate             | 4 (3.0)                                                  | 7 (5.2)                                                          | 11 (4.1)                                 |
| Fentanyl                            | 0 (0.0)                                                  | 1 (0.7)                                                          | 1 (0.4)                                  |
| Gabapentin                          | 1 (0.7)                                                  | 1 (0.7)                                                          | 2 (0.7)                                  |
| Ibuprofen                           | 0                                                        | 1 (0.7)                                                          | 1 (0.4)                                  |
| Morphine Sulfate                    | 6 (4.4)                                                  | 1 (0.7)                                                          | 7 (2.6)                                  |
| Nefopam Hydrochloride               | 0                                                        | 1 (0.7)                                                          | 1 (0.4)                                  |
| Oramorph                            | 0                                                        | 3 (2.2)                                                          | 3 (1.1)                                  |
| Paracetamol                         | 89 (65.9)                                                | 99 (73.3)                                                        | 188 (69.6)                               |
| Pregabalin                          | 1 (0.7)                                                  | 0 (0.0)                                                          | 1 (0.4)                                  |
| Tramadol Hydrochloride              | 8 (5.9)                                                  | 3 (2.2)                                                          | 11 (4.1)                                 |
| <b>At least one med at day 3</b>    | <b>90 (66.7)</b>                                         | <b>101 (74.8)</b>                                                | <b>191 (70.7)</b>                        |
| <b>Analgesic use at Day 4</b>       |                                                          |                                                                  |                                          |
| Buprenorphine patch                 | 1 (0.7)                                                  | 0 (0.0)                                                          | 1 (0.4)                                  |
| Codeine Phosphate                   | 15 (11.1)                                                | 15 (11.1)                                                        | 30 (11.1)                                |
| Dihydrocodeine Tartrate             | 4 (3.0)                                                  | 9 (6.7)                                                          | 13 (4.8)                                 |
| Fentanyl                            | 1 (0.7)                                                  | 1 (0.7)                                                          | 2 (0.7)                                  |
| Gabapentin                          | 1 (0.7)                                                  | 1 (0.7)                                                          | 2 (0.7)                                  |
| Ibuprofen                           | 0 (0.0)                                                  | 1 (0.7)                                                          | 1 (0.4)                                  |
| Paracetamol                         | 86 (63.7)                                                | 75 (55.6)                                                        | 161 (59.6)                               |
| Morphine Sulfate                    | 1 (0.7)                                                  | 2 (1.5)                                                          | 3 (1.1)                                  |
| Pregabalin                          | 1 (0.7)                                                  | 0 (0.0)                                                          | 1 (0.4)                                  |
| Tramadol Hydrochloride              | 3 (2.2)                                                  | 3 (2.2)                                                          | 6 (2.2)                                  |
| <b>At least one med at day 4</b>    | <b>88 (65.2)</b>                                         | <b>81 (60.0)</b>                                                 | <b>169 (62.6)</b>                        |
| <b>Analgesic use at Week 6</b>      |                                                          |                                                                  |                                          |
| Buprenorphine Patch                 | 3(2.2)                                                   | 0(0.0)                                                           | 3(1.1)                                   |
| Codeine Phosphate                   | 7(5.1)                                                   | 5(3.7)                                                           | 12(4.5)                                  |
| Dihydrocodeine Tartrate             | 1(0.7)                                                   | 3(2.2)                                                           | 4(1.5)                                   |
| Fentanyl                            | 1(0.7)                                                   | 0(0.0)                                                           | 1(0.4)                                   |
| Gabapentin                          | 2(1.5)                                                   | 1(0.7)                                                           | 3(1.1)                                   |
| Ibuprofen                           | 0(0.0)                                                   | 1(0.7)                                                           | 1(0.4)                                   |
| Morphine Sulfate                    | 0(0.0)                                                   | 1(0.7)                                                           | 1(0.4)                                   |
| Paracetamol                         | 35(25.9)                                                 | 38(28.1)                                                         | 73(27.0)                                 |
| Pregabalin                          | 1(0.7)                                                   | 0(0.0)                                                           | 1(0.4)                                   |
| Tramadol Hydrochloride              | 2(1.5)                                                   | 2(1.5)                                                           | 4(1.5)                                   |
| <b>At least one med at week 6</b>   | <b>41(30.4)</b>                                          | <b>41(30.4)</b>                                                  | <b>82(30.4)</b>                          |
| <b>Analgesic use at Week 12</b>     |                                                          |                                                                  |                                          |
| Buprenorphine Patch                 | 3(2.2)                                                   | 0(0.0)                                                           | 3(1.1)                                   |
| Codeine Phosphate                   | 7(5.2)                                                   | 4(3.0)                                                           | 11(4.1)                                  |



|                                    |                 |                 |                 |
|------------------------------------|-----------------|-----------------|-----------------|
| Dihydrocodeine Tartrate            | 0(0-0)          | 1(0-7)          | 1(0-4)          |
| Gabapentin                         | 2(1-5)          | 0(0-0)          | 2(0-7)          |
| Ibuprofen                          | 1(0-7)          | 0(0-0)          | 1(0-4)          |
| Morphine Sulfate                   | 1(0-7)          | 1(0-7)          | 2(0-7)          |
| Naproxen                           | 1(0-7)          | 0(0-0)          | 1(0-4)          |
| Paracetamol                        | 19(14-1)        | 20(14-8)        | 39(14-4)        |
| Tramadol Hydrochloride             | 1(0-7)          | 1(0-7)          | 2(0-7)          |
| <b>At least one med at week 12</b> | <b>23(17-0)</b> | <b>22(16-3)</b> | <b>45(16-7)</b> |

|                            | <b>Mini-sternotomy Group<br/>(n=135 patients)</b> | <b>Conventional sternotomy group<br/>(n=135)</b> |
|----------------------------|---------------------------------------------------|--------------------------------------------------|
| <b>Baseline pain score</b> |                                                   |                                                  |
| n                          | 128*                                              | 130*                                             |
| Mean± SD                   | 1.3 ± 2.1                                         | 0.9 ± 1.9                                        |
| (min-max)                  | 0 - 10                                            | 0 - 8                                            |
| <b>Day 2 pain score**</b>  |                                                   |                                                  |
| n                          | 123*                                              | 126*                                             |
| Mean± SD                   | 3.4 ± 2.4                                         | 3.7 ± 2.7                                        |
| (min-max)                  | 0 - 10                                            | 0 - 10                                           |
| <b>Day 3 pain score</b>    |                                                   |                                                  |
| n                          | 120*                                              | 129*                                             |
| Mean± SD                   | 2.8 ± 2.5                                         | 2.7 ± 2.3                                        |
| (min-max)                  | 0 - 9                                             | 0 - 8                                            |
| <b>Day 4 pain score</b>    |                                                   |                                                  |
| n                          | 116*                                              | 120*                                             |
| Mean± SD                   | 2.5 ± 2.2                                         | 2.1 ± 2.3                                        |
| (min-max)                  | 0 - 8                                             | 0 - 10                                           |
| <b>6 week pain score</b>   |                                                   |                                                  |
| n                          | 112*                                              | 118*                                             |
| Mean± SD                   | 1.5 ± 1.9                                         | 1.2 ± 1.8                                        |
| (min-max)                  | 0 - 8                                             | 0 - 8                                            |
| <b>12 week pain score</b>  |                                                   |                                                  |
| n                          | 128*                                              | 122*                                             |
| Mean± SD                   | 1.1 ± 1.9                                         | 1.0 ± 1.7                                        |
| (min-max)                  | 0 - 8                                             | 0 - 6                                            |

\*Pain scores were assessed wherever possible

\*\*Assessment on Day 2 was conducted with the patient blinded to their surgical allocation

**Table 5. Adverse Events**

| Adverse Event              | Mini-sternotomy Group<br>n = patients (%) | Conventional Sternotomy<br>Group<br>n = patients (%) | Total<br>n = patients (%) |
|----------------------------|-------------------------------------------|------------------------------------------------------|---------------------------|
| Death                      |                                           |                                                      |                           |
| In hospital                | 0/135 (0.0)                               | 0/135 (0.0)                                          | 0/270 (0.0)               |
| 12 weeks                   | 2/135 (1.5)                               | 2/135 (1.5)                                          | 4/270 (1.5)               |
| Stroke                     |                                           |                                                      |                           |
| In hospital                | 3/135 (3.0)                               | 1/135 (0.7)                                          | 4/270 (1.5)               |
| 12 weeks                   | 4/135 (3.0)                               | 1/135 (0.7)                                          | 5/270 (1.9)               |
| Transient Ischaemic Attack |                                           |                                                      |                           |
| In hospital                | 0/135 (0.0)                               | 1/135 (0.7)                                          | 1/270 (0.4)               |
| 12 weeks                   | 3/135 (2.2)                               | 1/135 (0.7)                                          | 4/270 (1.5)               |
| Renal failure              |                                           |                                                      |                           |
| In hospital                | 4/135 (2.3)                               | 0/135 (0.0)                                          | 4/270 (1.5)               |
| 12 weeks                   | 4/135 (2.3)                               | 1/135 (0.7)                                          | 5/270 (1.9)               |
| Atrial Arrhythmias         |                                           |                                                      |                           |
| In hospital                | 51/135 (37.8)                             | 42/135 (31.1)                                        | 93/270 (34.4)             |
| 12 weeks                   | 61/135 (45.2)                             | 51/135 (37.8)                                        | 112/270 (41.5)            |
| Ventricular Arrhythmias    |                                           |                                                      |                           |
| In hospital                | 2/135 (1.5)                               | 2/135 (1.5)                                          | 4/270 (1.5)               |
| 12 weeks                   | 2/135 (1.5)                               | 2/135 (1.5)                                          | 4/270 (1.5)               |
| Pericardial Effusion       |                                           |                                                      |                           |
| In hospital                | 4/135 (2.3)                               | 1/135 (0.7)                                          | 5/270 (1.9)               |
| 12 weeks                   | 9/135 (6.7)                               | 6/135 (4.4)                                          | 15/270 (5.6)              |
| Pulmonary Embolism         |                                           |                                                      |                           |
| In hospital                | 0/135 (0.0)                               | 0/135 (0.0)                                          | 0/270 (0.0)               |
| 12 weeks                   | 0/135 (0.0)                               | 2/135 (1.5)                                          | 2/270 (0.7)               |
| Chest Infection            |                                           |                                                      |                           |
| In hospital                | 7/135 (5.2)                               | 10/135 (7.4)                                         | 17/270 (6.3)              |
| 12 weeks                   | 18/135 (13.3)                             | 26/135 (19.3)                                        | 44/270 (16.3)             |
| Sternal wound infection    |                                           |                                                      |                           |
| In hospital                | 3/135 (2.2)                               | 1/135 (0.7)                                          | 4/270 (1.5)               |
| 12 weeks                   | 11/135 (8.1)                              | 3/135 (2.2)                                          | 14/270 (5.2)              |
| Re-operation for bleeding  | 3/135 (2.2)                               | 5/135 (3.7)                                          | 8/270 (3.0)               |

**Table 6. Health status, resource use and cost (complete cases)**

|                                          | Conventional [C] |       |     | Mini-sternotomy [M] |       |     | [M]-[C] <sup>1</sup> |                   |
|------------------------------------------|------------------|-------|-----|---------------------|-------|-----|----------------------|-------------------|
|                                          | mean             | (SD)  | N   | mean                | (SD)  | N   | mean                 | (95% CI)          |
| <b>Health status<sup>2</sup></b>         |                  |       |     |                     |       |     |                      |                   |
| EQ-5D Baseline                           | 0.764            | 0.245 | 130 | 0.763               | 0.235 | 128 | -0.001               | (-0.060 to 0.057) |
| EQ-5D 2 days                             | 0.349            | 0.349 | 133 | 0.353               | 0.291 | 128 | 0.004                | (-0.074 to 0.082) |
| EQ-5D 6 weeks                            | 0.798            | 0.194 | 118 | 0.751               | 0.221 | 112 | -0.048               | (-0.101 to 0.006) |
| EQ-5D 12 weeks                           | 0.838            | 0.207 | 124 | 0.782               | 0.248 | 127 | -0.056               | (-0.112 to 0.001) |
| EQ-5D AUC (0-12 weeks)                   | 0.162            | 0.041 | 105 | 0.153               | 0.040 | 98  | -0.009               | (-0.020 to 0.002) |
| <b>Resource use</b>                      |                  |       |     |                     |       |     |                      |                   |
| Index Admission                          |                  |       |     |                     |       |     |                      |                   |
| Length of stay (d) <sup>3</sup>          | 8.26             | 4.28  | 135 | 9.29                | 7.88  | 135 | 1.03                 | (-0.48 to 2.54)   |
| CICU (d)                                 | 1.21             | 0.99  | 135 | 1.61                | 5.52  | 135 | 0.39                 | (-0.55 to 1.34)   |
| HDU (d)                                  | 1.27             | 1.52  | 135 | 1.60                | 1.75  | 135 | 0.33                 | (-0.07 to 0.72)   |
| Cardiac ward (d)                         | 5.67             | 3.52  | 135 | 5.70                | 3.18  | 135 | 0.03                 | (-0.77 to 0.83)   |
| Stroke ward (d)                          | 0.03             | 0.34  | 135 | 0.11                | 1.00  | 135 | 0.08                 | (-0.10 to 0.26)   |
| Time in first surgery (h)                | 2.24             | 0.51  | 135 | 2.98                | 0.69  | 135 | 0.74                 | (0.60 to 0.89)    |
| Time in further surgery (h) <sup>4</sup> | 0.08             | 0.34  | 135 | 0.03                | 0.17  | 135 | -0.05                | (-0.11 to 0.02)   |
| Time in surgery (h) <sup>4</sup>         | 2.32             | 0.63  | 135 | 3.01                | 0.71  | 135 | 0.69                 | (0.53 to 0.85)    |
| RBC (u) <sup>4</sup>                     | 0.59             | 1.45  | 135 | 0.55                | 1.28  | 135 | -0.04                | (-0.37 to 0.28)   |
| FFP (u) <sup>4</sup>                     | 0.57             | 1.43  | 135 | 0.34                | 1.21  | 135 | -0.23                | (-0.55 to 0.09)   |
| Platelets (u) <sup>4</sup>               | 0.22             | 0.64  | 135 | 0.12                | 0.46  | 135 | -0.10                | (-0.24 to 0.03)   |
| Cryoprecipitate (u) <sup>4</sup>         | 0.01             | 0.09  | 135 | 0.00                | 0.00  | 135 | -0.01                | (-0.02 to 0.01)   |
| Post discharge contacts                  |                  |       |     |                     |       |     |                      |                   |
| GP surgery                               | 1.47             | 1.52  | 129 | 1.40                | 1.32  | 131 | -0.07                | (-0.41 to 0.28)   |
| GP home                                  | 0.09             | 0.32  | 129 | 0.19                | 0.56  | 131 | 0.10                 | (-0.01 to 0.21)   |
| GP telephone                             | 0.12             | 0.45  | 129 | 0.15                | 0.63  | 131 | 0.03                 | (-0.10 to 0.16)   |
| Nurse surgery                            | 1.38             | 2.56  | 129 | 2.07                | 3.54  | 131 | 0.69                 | (-0.06 to 1.44)   |
| Nurse home                               | 0.43             | 1.30  | 129 | 0.56                | 1.87  | 131 | 0.12                 | (-0.27 to 0.51)   |
| Nurse telephone                          | 0.05             | 0.25  | 129 | 0.04                | 0.26  | 131 | -0.01                | (-0.07 to 0.05)   |
| Outpatient hospital                      | 0.40             | 0.78  | 129 | 0.57                | 1.98  | 131 | 0.17                 | (-0.20 to 0.53)   |
| Inpatient hospital                       | 0.30             | 0.68  | 129 | 0.27                | 0.60  | 131 | -0.03                | (-0.18 to 0.13)   |
| Inpatient hospital (d)                   | 2.09             | 7.79  | 129 | 1.09                | 2.69  | 131 | -1.00                | (-2.42 to 0.42)   |
| Total Contacts                           | 4.29             | 3.53  | 129 | 5.47                | 4.90  | 131 | 1.18                 | (0.14 to 2.22)    |
| <b>Cost<sup>5</sup></b>                  |                  |       |     |                     |       |     |                      |                   |
| Cost of index admission                  | 7674             | 2055  | 135 | 8815                | 4517  | 135 | 1140                 | (303 to 1977)     |
| Cost post discharge                      | 824              | 2485  | 129 | 547                 | 925   | 131 | -277                 | (-734 to 180)     |
| Cost                                     | 8527             | 3558  | 129 | 9274                | 4542  | 131 | 746                  | (-245 to 1737)    |

1 OLS regression-estimated means and 95% confidence intervals

2 EQ-5D-3L index score

3 Length stay by ward does not sum to length of stay due to theatre and transit time, and rounding

4 Item includes index and post-discharge usage

5 Resource items were costed using national reference costs except for the index procedures which were costed by South Tees Hospitals NHS Foundation Trust

**Table 7. ICU Length of Stay, Fitness for Discharge and Hospital Length of Stay**

|                                             | Mini-sternotomy group<br>(n=135) | Conventional sternotomy<br>group (n=135) |
|---------------------------------------------|----------------------------------|------------------------------------------|
| <b>ICU stay (days)</b>                      |                                  |                                          |
| n                                           | 135                              | 135                                      |
| Mean $\pm$ SD                               | 1.9 $\pm$ 5.8                    | 1.3 $\pm$ 1.1                            |
| Min-Max                                     | 0 - 64*                          | 0 - 7                                    |
| <b>Fitness for discharge (days)</b>         |                                  |                                          |
| n                                           | 129**                            | 133**                                    |
| Mean $\pm$ SD                               | 6.5 $\pm$ 3.7                    | 6.3 $\pm$ 3.2                            |
| Min - Max                                   | 3 - 36                           | 3 - 31                                   |
| <b>Post-operative length of stay (days)</b> |                                  |                                          |
| n                                           | 135                              | 135                                      |
| Mean $\pm$ SD                               | 7.4 $\pm$ 7.5                    | 6.3 $\pm$ 3.1                            |
| Min - Max                                   | 3 - 79                           | 3 - 31                                   |

\*3 patients in the mini-sternotomy group were in ICU for more than 7 days. Excluding these patients, the range would have been 0-5 days for the mini-sternotomy group.

\*\*Fitness for discharge was assessed by the surgical and physiotherapy teams. For 6 patients in the mini-sternotomy group and 2 patients in the conventional sternotomy group this was not possible due staff availability at the point of discharge.

**Table 8. Pulmonary Function Tests**

|             | Mini-sternotomy group (n=135) | Conventional sternotomy group (n=135) | Mean Difference (95% CI; p value)    |
|-------------|-------------------------------|---------------------------------------|--------------------------------------|
| <b>FEV1</b> |                               |                                       |                                      |
| Baseline    |                               |                                       |                                      |
| n           | 123*                          | 123*                                  |                                      |
| Mean ± SD   | 2196.2 ± 712.2                | 2207.7 ± 748.2                        | -15.4<br>(-169.2,138.4)              |
| Min - Max   | 1000- 4340                    | 1020-4090                             |                                      |
| Day 4       |                               |                                       |                                      |
| n           | 105*                          | 110*                                  |                                      |
| Mean ± SD   | 1122.6 ± 433.0                | 1320.7 ± 523.5                        | -171.3**<br>(-265.3,-77.2; p=0.0004) |
| Min - Max   | 99-2400                       | 76-2910                               |                                      |
| 6 weeks     |                               |                                       |                                      |
| n           | 106*                          | 97*                                   |                                      |
| Mean ± SD   | 1962.0 ± 468.7                | 2018.1 ± 662.8                        | -7.3**<br>(-104.3,89.6)              |
| Min - Max   | 650-3570                      | 870-3570                              |                                      |
| <b>FVC</b>  |                               |                                       |                                      |
| Baseline    |                               |                                       |                                      |
| n           | 123*                          | 123*                                  |                                      |
| Mean ± SD   | 2908.5 ± 926.4                | 2929.2 ± 955.7                        | -31.6<br>(-238.8,175.7)              |
| Min - Max   | 1250-6060                     | 1200-5650                             |                                      |
| Day 4       |                               |                                       |                                      |
| n           | 105*                          | 110*                                  |                                      |
| Mean ± SD   | 1478.9 ± 583.3                | 1697.5 ± 706.8                        | -129.7**<br>(-259.2,-0.1; p=0.0498)  |
| Min - Max   | 139-2910                      | 109-3920                              |                                      |
| 6 weeks     |                               |                                       |                                      |
| n           | 106*                          | 97*                                   |                                      |
| Mean ± SD   | 2529.4 ± 824.0                | 2615.9 ± 864.0                        | -36.0**<br>(-173.2,101.2)            |
| Min - Max   | 1180-4760                     | 1000-4840                             |                                      |

\*It was not possible for all patients to complete pulmonary function tests

\*\*After adjusting for randomisation factors and baseline data
